# Supplementary material for: RADseq population genomics confirms divergence across closely related species in blue coral (Heliopora coerulea)
Source: PubMed Central journal article supplement (PMC6794731; doi:10.1186/s12862-019-1522-0), 2019-10-15
Supplement: 12862_2019_1522_MOESM2_ESM.pdf [file 12862_2019_1522_MOESM2_ESM.pdf]

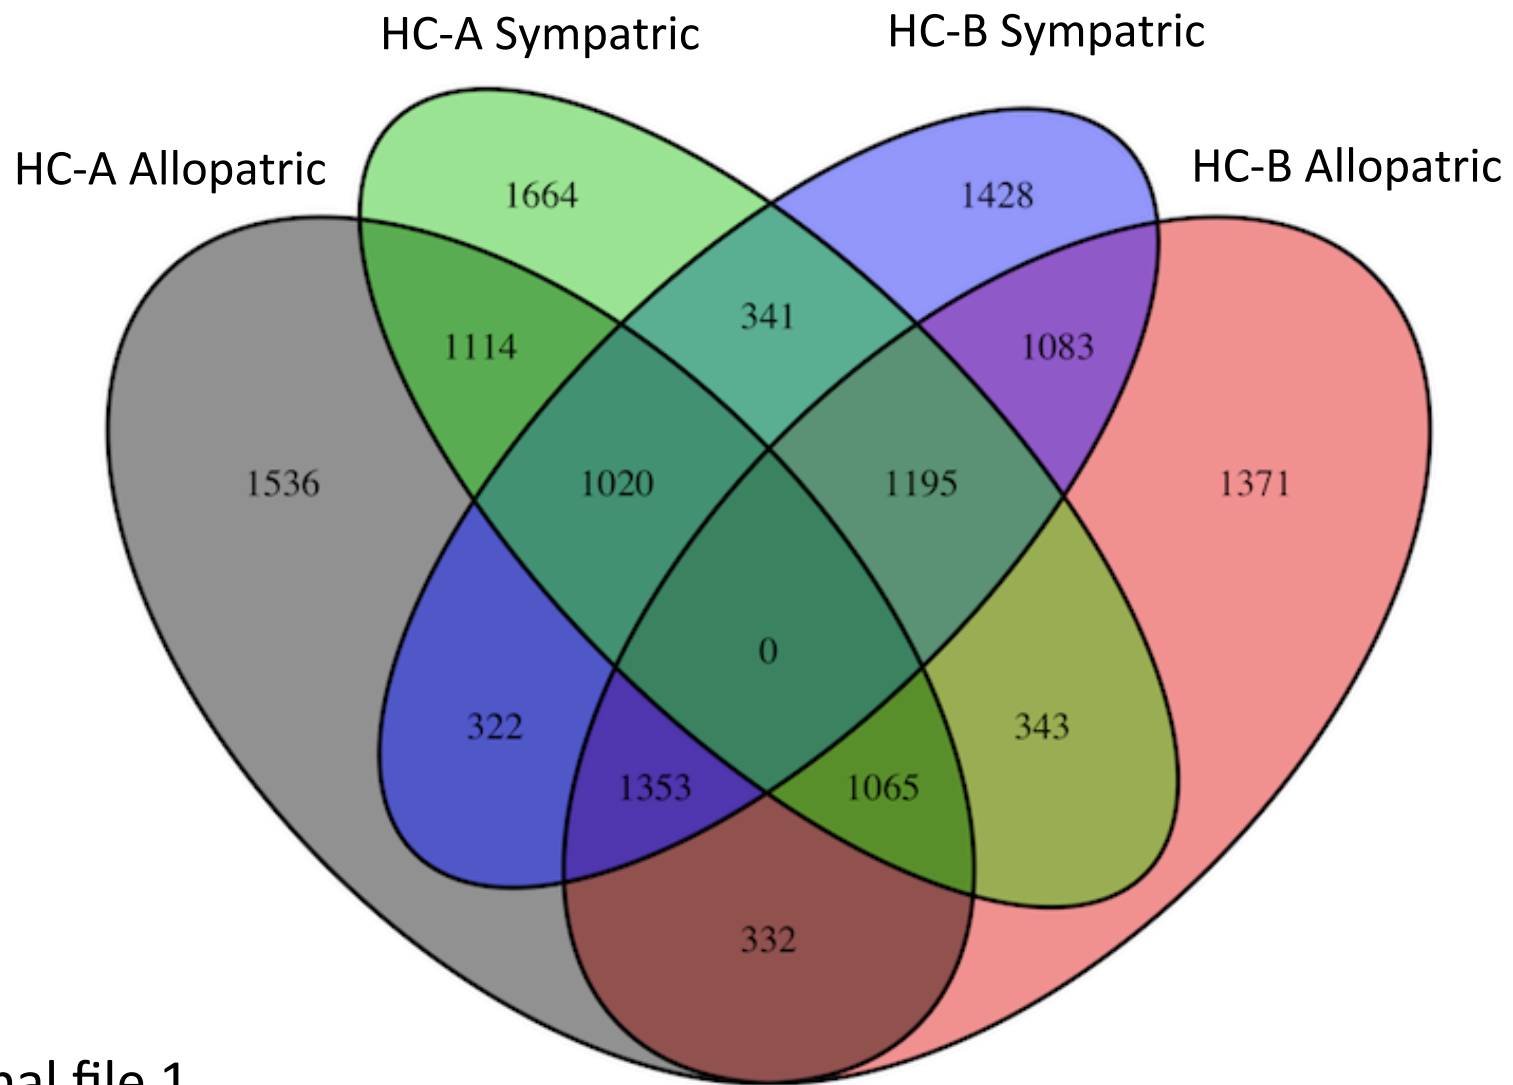

Additional file 1
